# Supplementary material
Source: publisher figshare collection journal article supplement (https://acs.figshare.com/ndownloader/files/15667379)
Supplement: Supplementary file 1 [file 15667379 › info.xml]

<presentation>
	<article>
		<title>Molecular Docking Guided Ungual Drug Delivery Design for Amelioration of Onychomycosis.</title>
		<doi>10.1021/acsomega.9b00436</doi>
		<copyright>American Chemical Society</copyright>
		<narrator>Nazia Hassan</narrator>
		<contact>Zeenat Iqbal</contact>
		<contact-email>zeenatiqbal@jamiahamdard.ac.in</contact-email>
		<author-list>
			<author>Zeenat Iqbal</author>
		</author-list>
	</article>
	<slides height-width-ratio=".75">
		<slide audio-time="20">
			<subtitle/>
		</slide>
		<slide audio-time="143">
			<subtitle/>
		</slide>
		<slide audio-time="135">
			<subtitle/>
		</slide>
		<slide audio-time="120">
			<subtitle/>
		</slide>
		<slide audio-time="40">
			<subtitle/>
		</slide>
		<slide audio-time="40">
			<subtitle/>
		</slide>
	</slides>
	<audio duration="498"/>
</presentation>
